# Supplementary material for: Regiospecific protonation of organic chromophores
Source: Royal Society of Chemistry journal article supplement (doi:10.1039/c6cp02747d), 2016-01-01
Supplement: c6cp02747d1.pdf [file c6cp02747d1.pdf]

## Supporting Information

### Regiospecific Protonation of Organic Chromophores

Tao Tang,<sup>a,b</sup> Tingting Lin,<sup>b</sup> FuKe Wang<sup>b,c\*</sup> and Chaobin He<sup>a,b\*</sup>

a. Department of Materials Science and Engineering, National University of Singapore, 9 Engineering Drive 1, Singapore 117576

b. Institute of Materials Research and Engineering, A\*STAR (Agency for Science, Technology and Research), 2 Fusionopolis Way, #08-03, Singapore 138634

c. Department of Chemistry, National University of Singapore, 3 Science Drive 3, Singapore

Email: [wangf@imre.a-star.edu.sg](mailto:wangf@imre.a-star.edu.sg); [msehc@nus.edu.sg](mailto:msehc@nus.edu.sg) or [cb-he@imre.a-star.edu.sg](mailto:cb-he@imre.a-star.edu.sg).

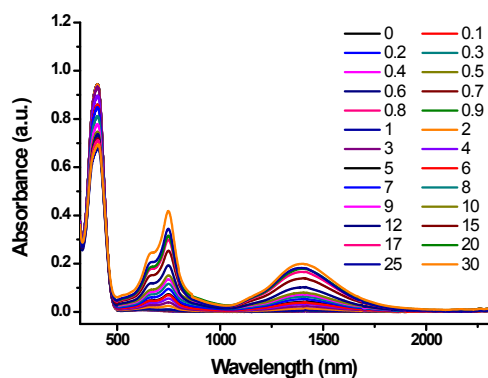

**Figure S1.** UV-vis-NIR spectrum of chromophore **M3** under different TFA concentration in chloroform solution.

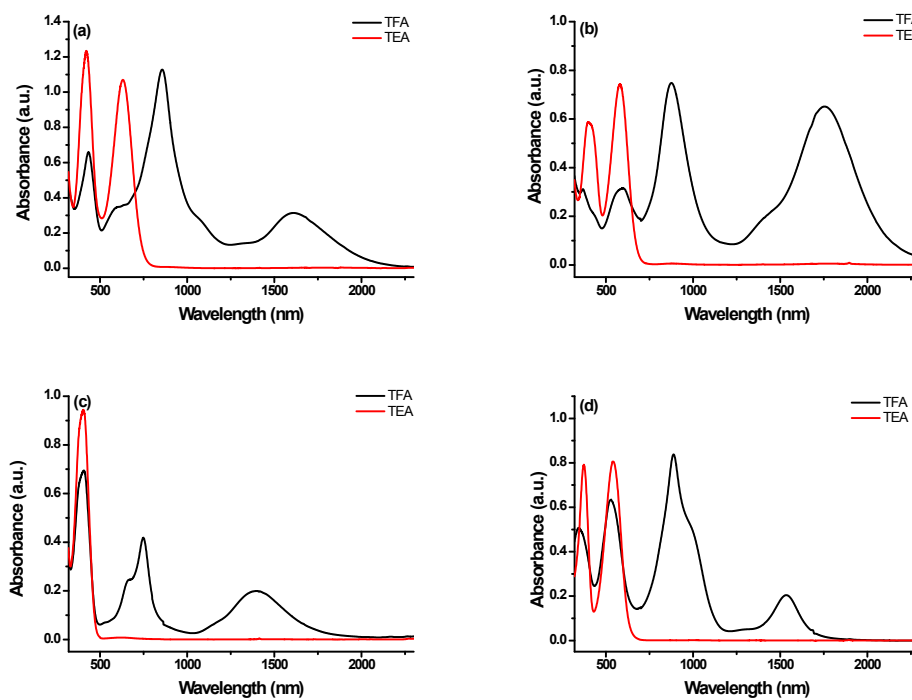

**Figure S2.** UV-vis-NIR spectrum of chromophores upon the treatment of TFA and then TEA in chloroform solution: (a) **M1**, (b) **M2**, (c) **M3** and (d) **M4**.

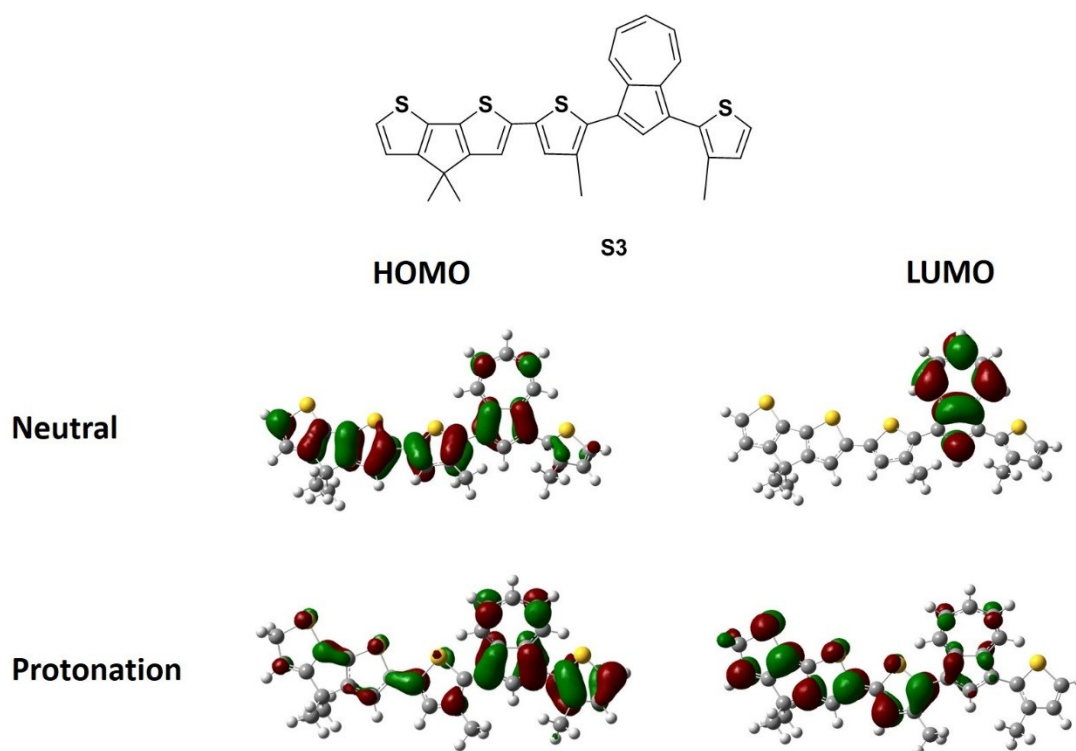

**Figure S3.** Upper: Simplified monomer **S3** for DFT calculation; bottom: optimized structures of frontier molecular orbitals for model compounds **S3** in their neutral and protonated states.

**Table S1.** The corrected Zero Point Vibrational Energies (ZPE) and Proton Affinities (PA) calculated by G09 at different sites of Mod-S3-1.

| Entry | scaled ZPE (au) | PA (kcal/mol) |
|-------|-----------------|---------------|
| P1    | 0.5765          | 242.7         |
| P2    | 0.5760          | 240.5         |
| P3    | 0.5749          | 230.7         |
| P4    | 0.5751          | 231.1         |

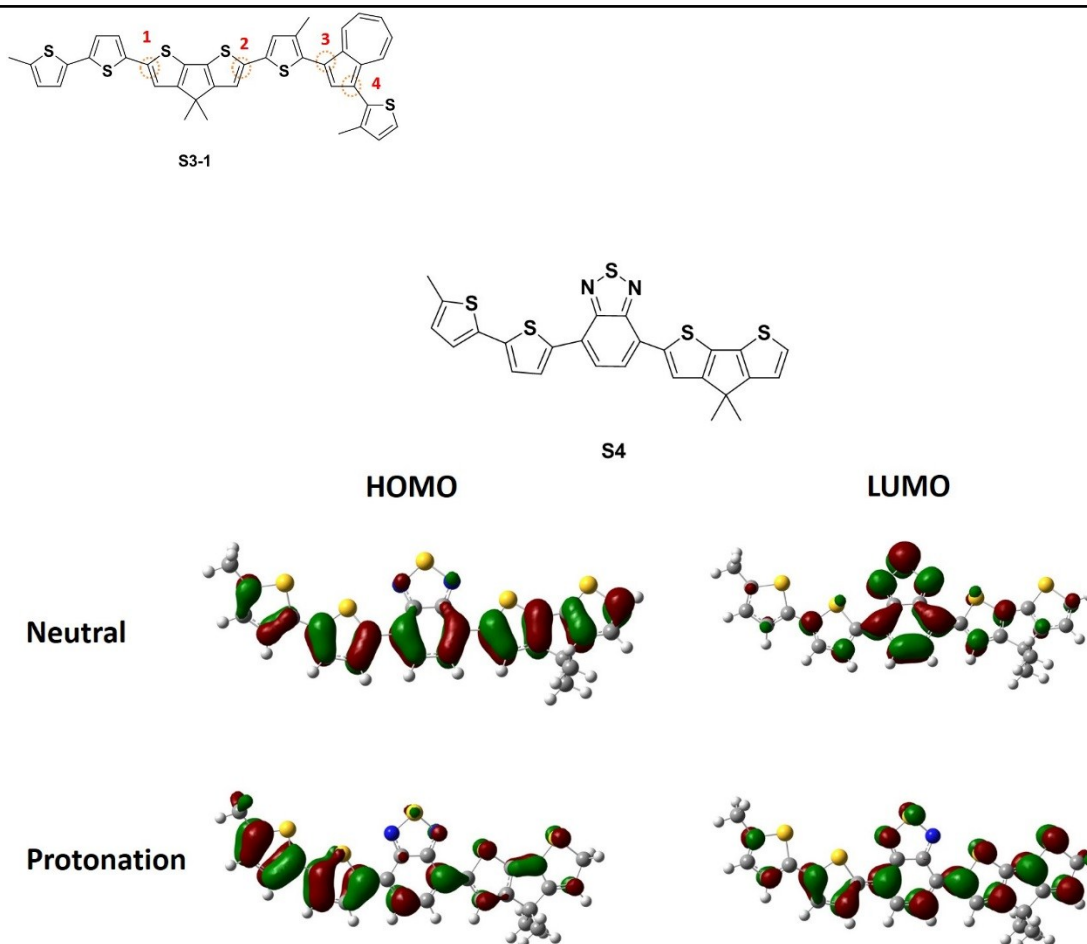

**Figure S4.** Upper: Simplified monomer **S4** for DFT calculation; bottom: optimized structures of frontier molecular orbitals for model compounds **S4** in their neutral and protonated states.

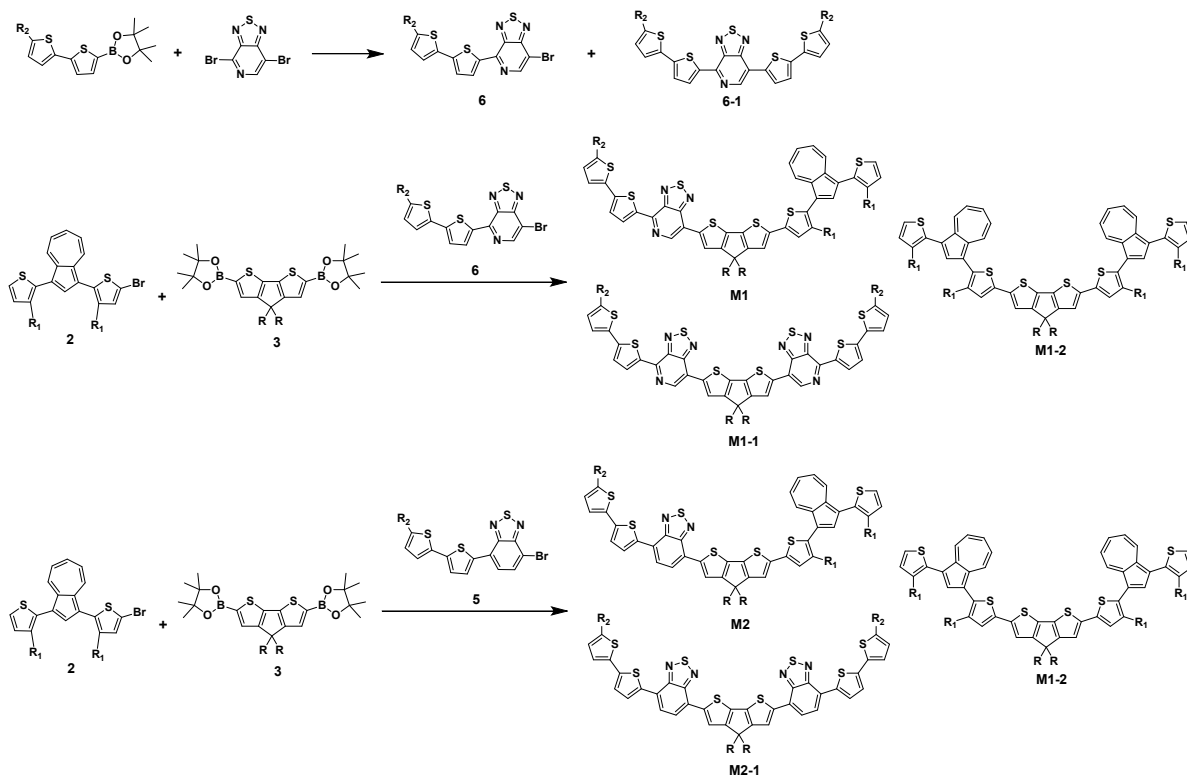

**Scheme S1** The possible by-products formation in the Suzuki coupling for compounds **6**, **M1** and **M2**.

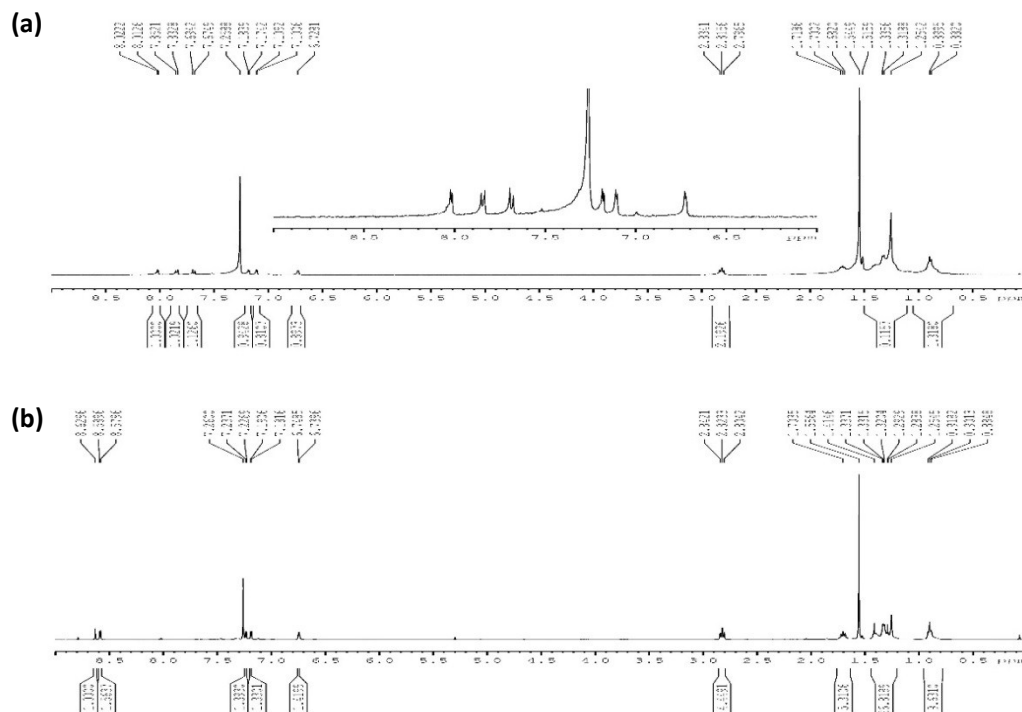

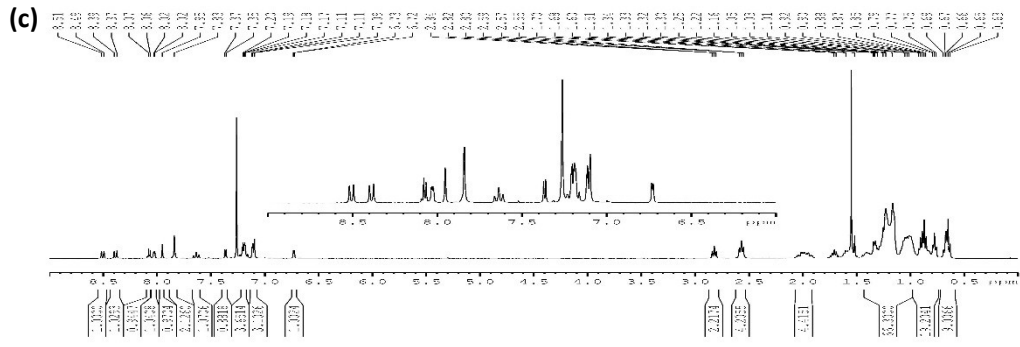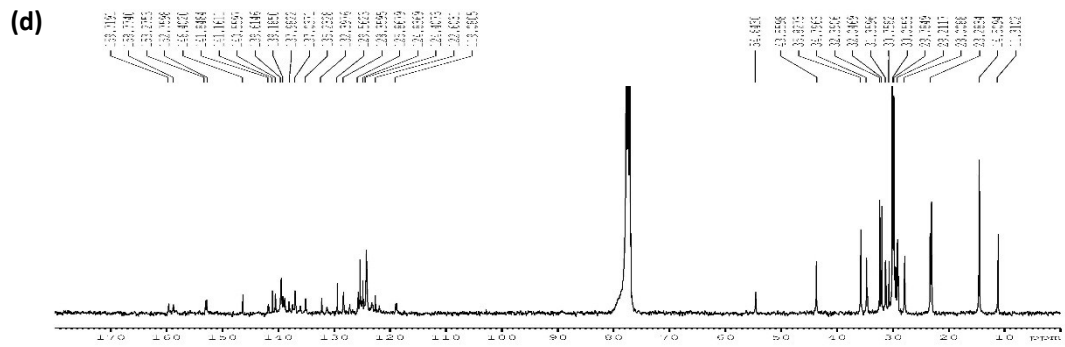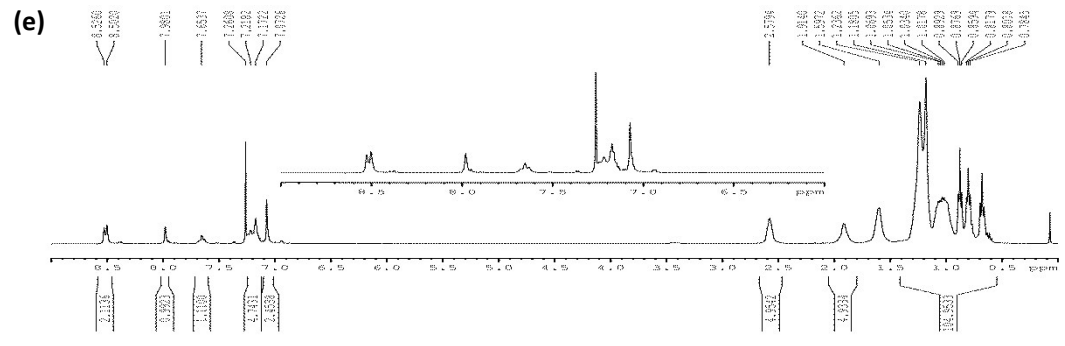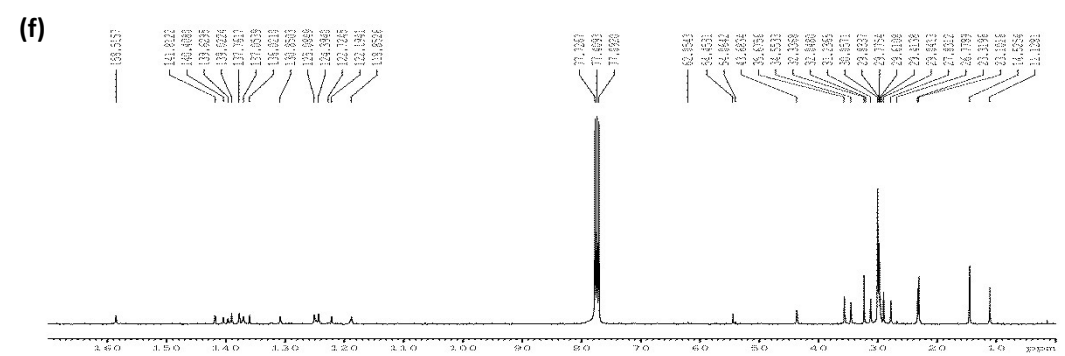



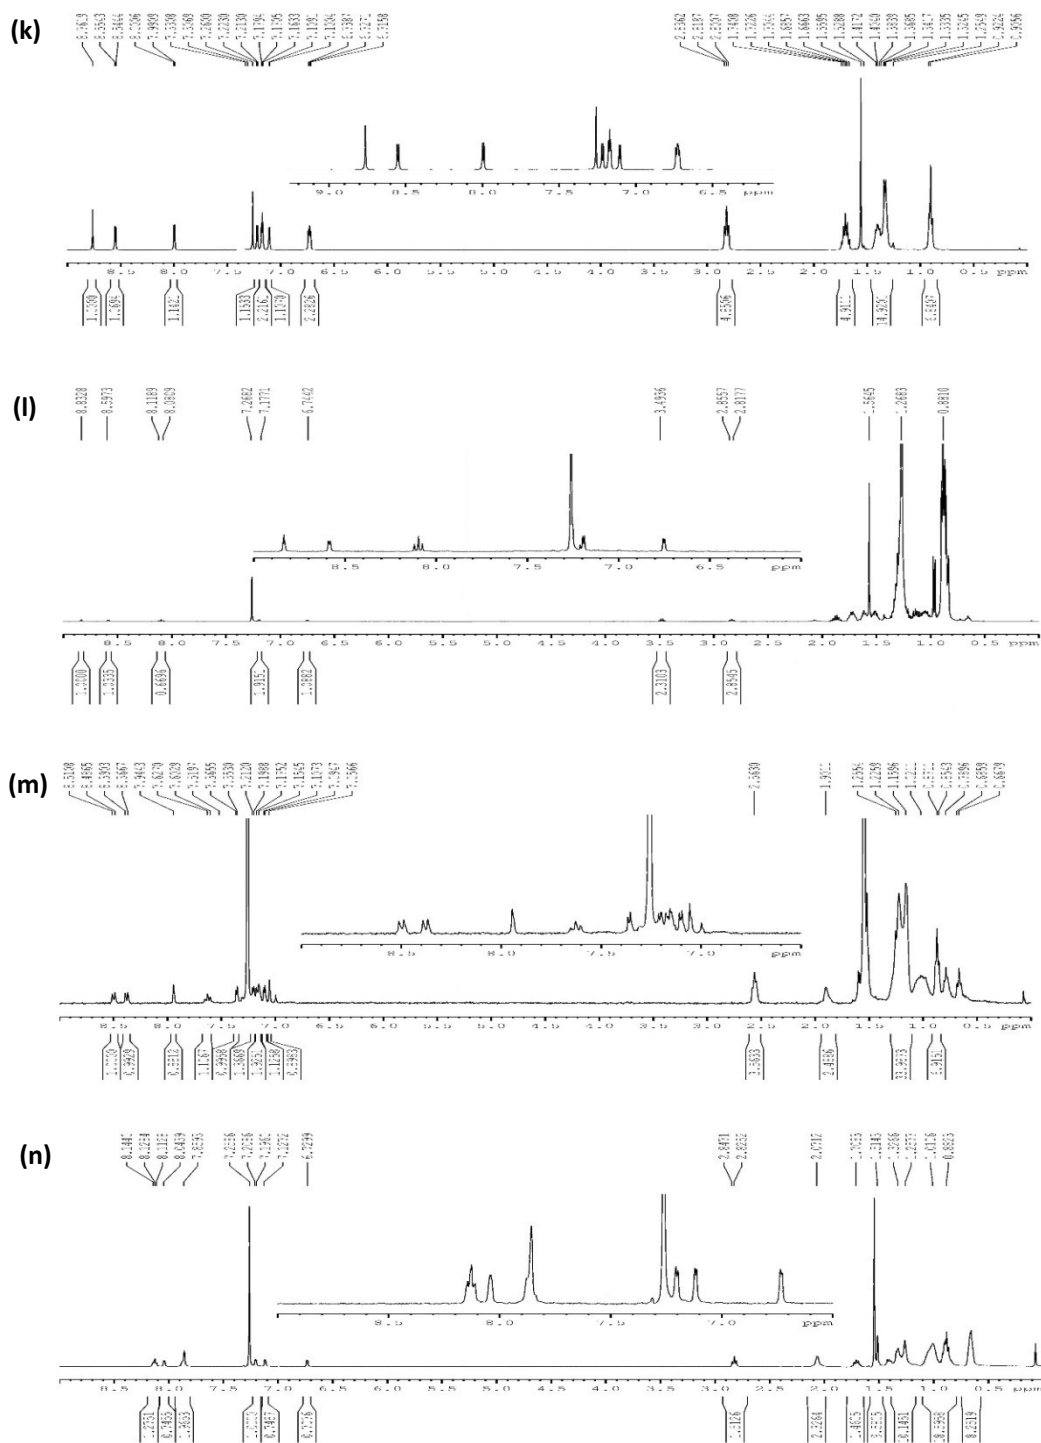

**Figure S5.** NMR spectra of monomers. (a)  $^1\text{H}$ -NMR spectra of monomer **5**; (b)  $^1\text{H}$ -NMR spectra of monomer **6**; (c) and (d),  $^1\text{H}$ -NMR and  $^{13}\text{C}$ -NMR spectra of monomer **M1**; (e) and (f),  $^1\text{H}$ -NMR and  $^{13}\text{C}$ -NMR spectra of monomer **M2**; (g) and (h),  $^1\text{H}$ -NMR and  $^{13}\text{C}$ -NMR spectra of monomer **M3**; (i) and (j),  $^1\text{H}$ -NMR and  $^{13}\text{C}$ -NMR spectra of monomer **M4**;  $^1\text{H}$ -NMR spectra of monomers: (k) **6-1**, (l) **M1-1**, (m) **M1-2** and (n) **M2-1**.
